# Supplementary material for: A green, facile, and rapid method for microextraction and Raman detection of titanium dioxide nanoparticles from milk powder
Source: Royal Society of Chemistry journal article supplement (doi:10.1039/c7ra02520c), 2017-01-01
Supplement: c7ra02520c1.pdf [file c7ra02520c1.pdf]

## Electronic Supplementary Information

### **A Green, Facile, and Rapid Method for Microextraction and Raman Detection of Titanium Dioxide Nanoparticles from Milk Powder**

Bin Zhao,<sup>a</sup> Xiaoqiong Cao,<sup>a</sup> Roberto De La Torre-Roche,<sup>c</sup> Chen Tan,<sup>a</sup> Tianxi Yang,<sup>a</sup> Jason C. White,<sup>c</sup> Hang Xiao,<sup>a</sup> Baoshan Xing,<sup>b</sup> and Lili He<sup>a,\*</sup>

<sup>a</sup> Department of Food Science, University of Massachusetts, Amherst, Massachusetts 01003, United States

<sup>b</sup> Stockbridge School of Agriculture, University of Massachusetts, Amherst, Massachusetts 01003, United States

<sup>c</sup> Department of Analytical Chemistry, The Connecticut Agricultural Experiment Station, New Haven, Connecticut 06511, United States

\*Corresponding author

Email: [lilihe@foodsci.umass.edu](mailto:lilihe@foodsci.umass.edu); Tel: +1 413 545 5847.

**A**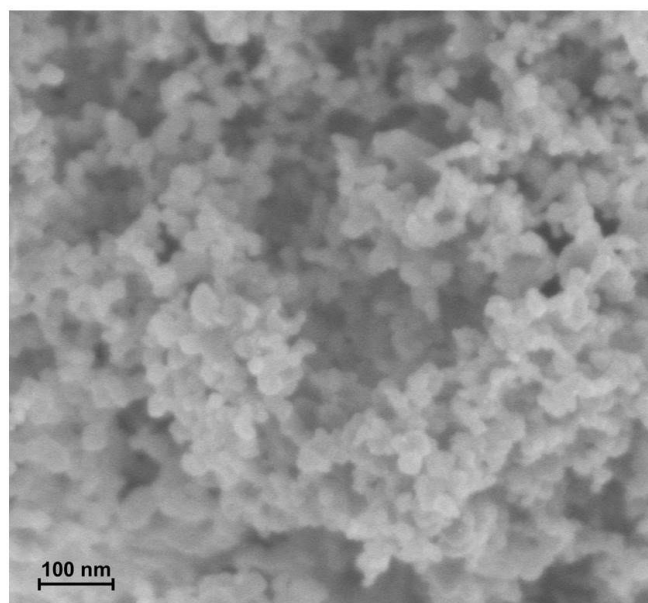**B**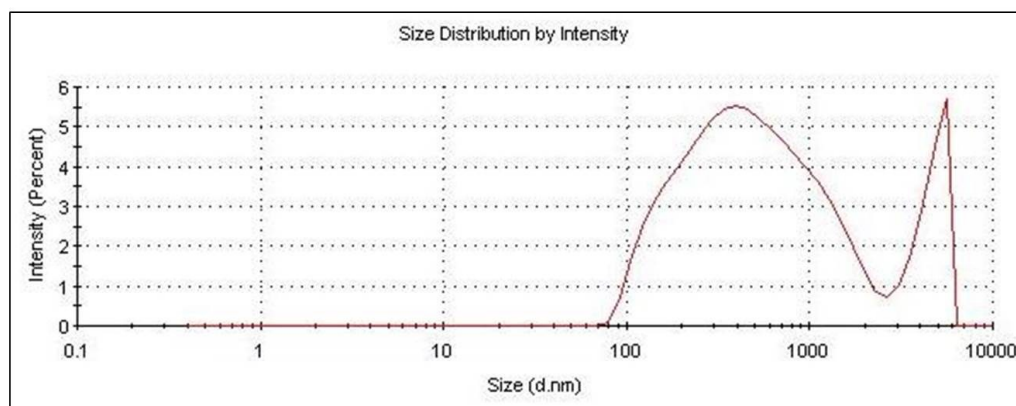

**Fig. S1** (A) SEM image of 21 nm TiO<sub>2</sub> nanopowder. (B) Size distribution data of TiO<sub>2</sub> NPs aqueous suspension.

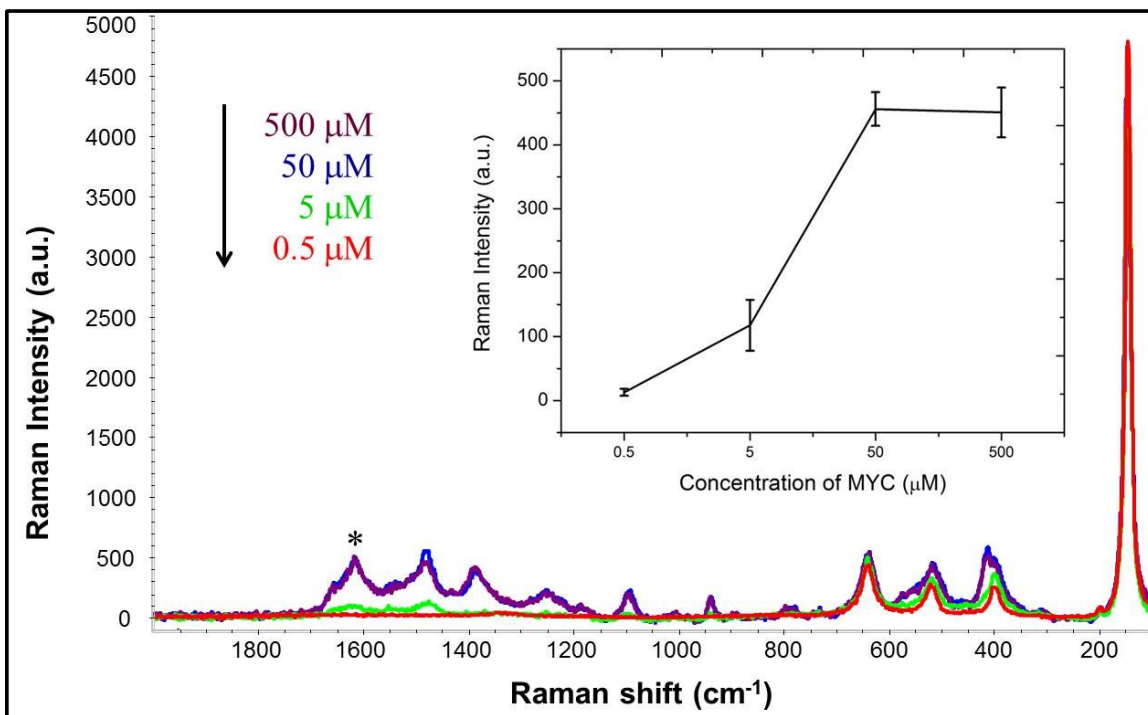

**Fig. S2** The dependence of SERS signals on the concentration of MYC adsorbed on TiO<sub>2</sub> NPs. Inset: Plot of SERS intensity of MYC at 1615 cm<sup>-1</sup> corresponding to various MYC concentration.

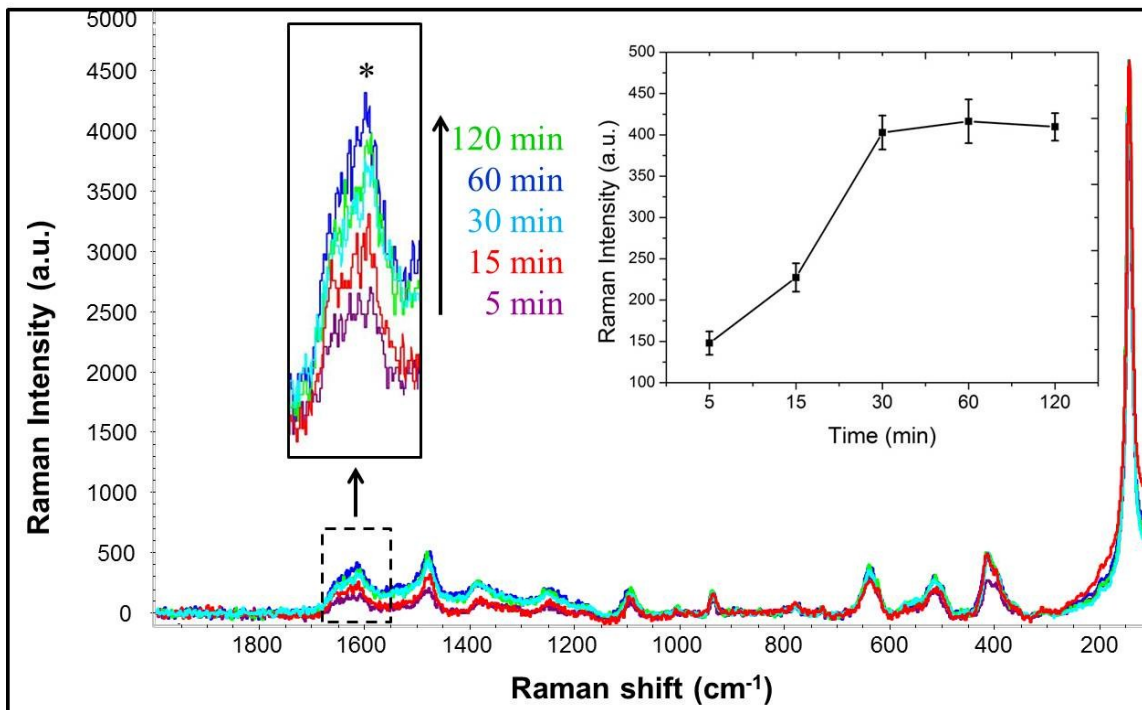

**Fig. S3** The dependence of SERS signals on the incubation time of MYC adsorbed on TiO<sub>2</sub> NPs. The concentration of MYC was 500 μM. Inset: Plot of SERS intensity of MYC at 1615 cm<sup>-1</sup> corresponding to various incubation time.

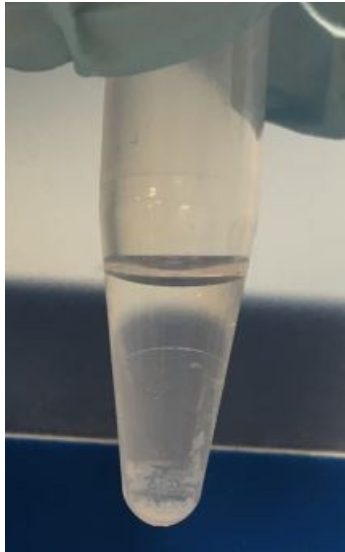

**Fig. S4** Photograph of TiO<sub>2</sub> NPs without MYC treatment after 30 min phase separation.
